# Supplementary material for: A comparison between veterinary small animal general practitioners and emergency practitioners in Australia. Part 1: demographic and work-related factors
Source: PubMed Central journal article supplement (PMC10993158; doi:10.3389/fvets.2024.1355505), 2024-03-21
Supplement: Table_1.pdf [file Table_1.pdf]

## *Supplementary Material*

**Supplementary Table 1.** Survey Questions - A survey study of burnout and risk factors in Australian emergency and general practice veterinarians.

| <b>Questions</b>                                                                                                                                                                                                                                                                                                                                                                                                                                                                                                                                                                                                                                                                                                   | <b>Options</b>                                                                                                                                                                                                                                                                 |
|--------------------------------------------------------------------------------------------------------------------------------------------------------------------------------------------------------------------------------------------------------------------------------------------------------------------------------------------------------------------------------------------------------------------------------------------------------------------------------------------------------------------------------------------------------------------------------------------------------------------------------------------------------------------------------------------------------------------|--------------------------------------------------------------------------------------------------------------------------------------------------------------------------------------------------------------------------------------------------------------------------------|
| I have read the participant information sheet. I am over the age of 18 and consent to participate in this study.                                                                                                                                                                                                                                                                                                                                                                                                                                                                                                                                                                                                   | Yes<br>No                                                                                                                                                                                                                                                                      |
| I am a small animal veterinarian, who is currently practicing in a metropolitan area within Australia. I am currently working in either emergency or general practice.<br>Definition of metropolitan area according to the Rural, Remote and Metropolitan Areas Classification (RRMA) 1991: an urban centre with a population of 100 000 or more. If you are unsure whether you are working in a metropolitan area, you can check your RRMA classification by searching your suburb on:<br><a href="https://www.health.gov.au/resources/apps-and-tools/health-workforce-locator/health-workforce-locator">https://www.health.gov.au/resources/apps-and-tools/health-workforce-locator/health-workforce-locator</a> | Yes<br>No                                                                                                                                                                                                                                                                      |
| <b>Part 1/3 – Work Related Questions</b>                                                                                                                                                                                                                                                                                                                                                                                                                                                                                                                                                                                                                                                                           |                                                                                                                                                                                                                                                                                |
| What is your principal area of practice?<br>*Place of work where you have spent more than 60% of your time in the last 3 months.                                                                                                                                                                                                                                                                                                                                                                                                                                                                                                                                                                                   | Small animal general practice<br>Small animal emergency practice                                                                                                                                                                                                               |
| How long have you worked in your principal area of practice (GP / emergency)?<br>*In years (e.g., 6 months = 0.5 years)                                                                                                                                                                                                                                                                                                                                                                                                                                                                                                                                                                                            | (Free text response)                                                                                                                                                                                                                                                           |
| What is your position in your practice?                                                                                                                                                                                                                                                                                                                                                                                                                                                                                                                                                                                                                                                                            | Associate veterinarian<br>Management<br>Practice owner                                                                                                                                                                                                                         |
| On average, how many hours do you work per week?<br>*Include all paid and unpaid overtime                                                                                                                                                                                                                                                                                                                                                                                                                                                                                                                                                                                                                          | Less than 35 hours per week<br>35 - 40 hours per week<br>40 - 50 hours per week<br>50 - 60 hours per week<br>Greater than 60 hours per week                                                                                                                                    |
| Which of the following best describe your shift pattern in the past month?                                                                                                                                                                                                                                                                                                                                                                                                                                                                                                                                                                                                                                         | Only day shifts (work hours largely fall between 7am - 7pm)<br>Only night shifts (work hours largely fall between 7pm - 7am)<br>Majority day shifts (more than 70%)<br>Majority night shifts (more than 70%)<br>None of the above (less than 70% of either day or night shift) |
| How often do you work on the weekend?                                                                                                                                                                                                                                                                                                                                                                                                                                                                                                                                                                                                                                                                              | At least one day every weekend<br>1 in 2 weekends<br>1 in 3 weekends                                                                                                                                                                                                           |

|                                                                                                                                                                                                |                                                                                                                                                                                                                                                                             |
|------------------------------------------------------------------------------------------------------------------------------------------------------------------------------------------------|-----------------------------------------------------------------------------------------------------------------------------------------------------------------------------------------------------------------------------------------------------------------------------|
|                                                                                                                                                                                                | 1 in 4 weekends<br>Infrequently (less than 1 in 4 weekends)<br>I never work on the weekend                                                                                                                                                                                  |
| Which of the following statements best describe your work schedule on a public holiday?<br>*Please answer with regard to the public holidays observed in the state/territory in which you work | I am not required to work on a public holiday.<br>I am able to choose if I want to work on a public holiday.<br>I am required to work less than 50% of public holidays.<br>I am required to work 50% or more public holidays.<br>I am required to work every public holiday |
| My roster pattern is set and predictable.                                                                                                                                                      | Yes<br>No                                                                                                                                                                                                                                                                   |
| I receive my roster well enough in advance to be able to plan my life outside of work.                                                                                                         | Yes<br>No                                                                                                                                                                                                                                                                   |
| In relation to the previous question, on average how many weeks in advance do you receive your roster?<br>(In weeks)                                                                           | (Free text response)                                                                                                                                                                                                                                                        |
| On average, how many unpaid hours do you work per week?                                                                                                                                        | Less than 1 hour<br>1 - 3 hours<br>4 - 6 hours<br>7 - 10 hours<br>Greater than 10 hours                                                                                                                                                                                     |
| How frequently are you able to finish all required work within your rostered shift time?                                                                                                       | Always<br>Majority of the time.<br>Occasionally<br>Rarely<br>Never                                                                                                                                                                                                          |
| What is the main contributing factor to not finishing on time?                                                                                                                                 | Scheduling factors<br>Inappropriate staffing or short staffing<br>Personal reasons<br>Equipment/software inadequacies<br>Pressure to fit in walk-in consults<br>Other                                                                                                       |
| If other, please specify.                                                                                                                                                                      | (Free text response)                                                                                                                                                                                                                                                        |
| In the past week, the following statement best describes my meal breaks.<br>*Please answer based on what happened for the majority of the week.                                                | Unable to take a meal break (< 30 minutes)<br>Meal break 30min - 1 hour, interrupted by work<br>Meal break 30min - 1 hour, uninterrupted<br>Meal break greater than 1 hour, interrupted by work<br>Meal break greater than 1 hour, uninterrupted                            |

|                                                                                                                                                                                                                                            |                                                                                                                                                                                                                                                                                                                                      |
|--------------------------------------------------------------------------------------------------------------------------------------------------------------------------------------------------------------------------------------------|--------------------------------------------------------------------------------------------------------------------------------------------------------------------------------------------------------------------------------------------------------------------------------------------------------------------------------------|
| In regards to your current place of work, how would you describe the socioeconomic situation of the majority of your clientele?                                                                                                            | Low income and pensioners<br>Middle income<br>Upper-middle income<br>Affluent income<br>Diverse (even mix of all of the above)                                                                                                                                                                                                       |
| Think back to the past week, how often are your clients receptive and compliant with your diagnostic and treatment recommendations?                                                                                                        | Always<br>Majority of the time<br>Occasionally<br>Rarely<br>Never                                                                                                                                                                                                                                                                    |
| How many times did you experience patient death (non-euthanasia) in the past month?                                                                                                                                                        | None<br>1-3 times<br>4-6 times<br>Greater than 6 times<br>Do not recall                                                                                                                                                                                                                                                              |
| How many euthanasias were you requested to perform in the past month?                                                                                                                                                                      | None<br>1-3<br>4-6<br>7-10<br>Greater than 10                                                                                                                                                                                                                                                                                        |
| In relation to the previous question, how many euthanasias were you requested to perform where the primary reason was due to financial limitations?                                                                                        | Always<br>Frequently<br>Occasionally<br>Rarely<br>Never                                                                                                                                                                                                                                                                              |
| In the past week, how often were you required to deliver negative news* to clients regarding their pet's health?<br>*negative news can be serious illness, life-threatening conditions, terminal illness or recommendation for euthanasia. | Always<br>Frequently<br>Occasionally<br>Rarely<br>Never                                                                                                                                                                                                                                                                              |
| In the past week, I feel that my practice was appropriately staffed on most days of the week.                                                                                                                                              | Yes<br>No                                                                                                                                                                                                                                                                                                                            |
| Which of the following statements best describe your current workplace environment?                                                                                                                                                        | Both my colleagues and the management team are supportive and collegial.<br>My colleagues are supportive and collegial, but I am pressured by a toxic management team.<br>My colleagues are toxic, but my management team is supportive.<br>Both my colleagues and the management team contributes to a toxic workplace environment. |
| In your current place of work, have you experienced or witnessed workplace bullying?                                                                                                                                                       | Experienced workplace bullying<br>Witnessed workplace bullying<br>No, did not experience or witness workplace bullying                                                                                                                                                                                                               |

|                                                                                                                                                                                                                                                                                                                                                                                           |                                                                                                                                                                                                                                                  |
|-------------------------------------------------------------------------------------------------------------------------------------------------------------------------------------------------------------------------------------------------------------------------------------------------------------------------------------------------------------------------------------------|--------------------------------------------------------------------------------------------------------------------------------------------------------------------------------------------------------------------------------------------------|
| In the past week, I feel satisfied with what I have achieved at work.                                                                                                                                                                                                                                                                                                                     | Yes<br>No                                                                                                                                                                                                                                        |
| In the past week, how often were you interacting with emotionally distressed clients?<br>*For example: anxious, sad or angry clients.                                                                                                                                                                                                                                                     | Always<br>Frequently<br>Occasionally<br>Rarely<br>Never                                                                                                                                                                                          |
| I am satisfied with my remuneration for the work that is required of me.                                                                                                                                                                                                                                                                                                                  | Yes<br>No                                                                                                                                                                                                                                        |
| In the past year, have you seriously considered leaving your principal area of practice (GP/Emergency)?                                                                                                                                                                                                                                                                                   | Yes<br>No                                                                                                                                                                                                                                        |
| After leaving your current role, what type of work will you consider transitioning into?                                                                                                                                                                                                                                                                                                  | Another type of clinical role in veterinary medicine<br>Pursue further training or specialisation within veterinary medicine<br>Non-clinical role, but related to veterinary medicine<br>Leaving the veterinary medicine profession<br>Undecided |
| <b>Part 2/3 – Burnout Measurement</b>                                                                                                                                                                                                                                                                                                                                                     |                                                                                                                                                                                                                                                  |
| The following three sets of similar questions are in relation to how you feel about your work, client interactions and personal life.                                                                                                                                                                                                                                                     |                                                                                                                                                                                                                                                  |
| <b>Work burnout</b>                                                                                                                                                                                                                                                                                                                                                                       |                                                                                                                                                                                                                                                  |
| Do you feel worn out at the end of the working day?<br>Are you exhausted in the morning at the thought of another day at work?<br>Do you feel that every working hour is tiring for you?<br>Do you have enough energy for family and friends during leisure time?<br>Is your work emotionally exhausting?<br>Does your work frustrate you?<br>Do you feel burnt out because of your work? | Never<br>Seldom<br>Sometimes<br>Often<br>Always                                                                                                                                                                                                  |
| <b>Client burnout</b>                                                                                                                                                                                                                                                                                                                                                                     |                                                                                                                                                                                                                                                  |
| Do you find it hard to work with clients?<br>Does it drain your energy to work with clients?<br>Do you find it frustrating to work with clients?<br>Do you feel that you give more than you get back when you work with clients?<br>Are you tired of working with clients?<br>Do you sometimes wonder how long you will be able to continue working with clients?                         | Never<br>Seldom<br>Sometimes<br>Often<br>Always                                                                                                                                                                                                  |
| <b>Personal burnout</b>                                                                                                                                                                                                                                                                                                                                                                   |                                                                                                                                                                                                                                                  |
| How often do you feel tired?<br>How often are you physically exhausted?<br>How often are you emotionally exhausted?                                                                                                                                                                                                                                                                       | Never<br>Seldom<br>Sometimes                                                                                                                                                                                                                     |

|                                                                                                                                                                                                                                                                                                                                                                                                                                                                                                                                                                                                                                                                                 |                                                                                                                                                                                        |
|---------------------------------------------------------------------------------------------------------------------------------------------------------------------------------------------------------------------------------------------------------------------------------------------------------------------------------------------------------------------------------------------------------------------------------------------------------------------------------------------------------------------------------------------------------------------------------------------------------------------------------------------------------------------------------|----------------------------------------------------------------------------------------------------------------------------------------------------------------------------------------|
| How often do you think: “I can’t take it anymore”?<br>How often do you feel worn out?<br>How often do you feel weak and susceptible to illness?                                                                                                                                                                                                                                                                                                                                                                                                                                                                                                                                 | Often<br>Always                                                                                                                                                                        |
| <b>Part 3/3 – Demographic characteristics</b>                                                                                                                                                                                                                                                                                                                                                                                                                                                                                                                                                                                                                                   |                                                                                                                                                                                        |
| Which gender do you identify with the most?                                                                                                                                                                                                                                                                                                                                                                                                                                                                                                                                                                                                                                     | Female<br>Male<br>Other                                                                                                                                                                |
| What is your age?<br>(In years)                                                                                                                                                                                                                                                                                                                                                                                                                                                                                                                                                                                                                                                 | (Free text response)                                                                                                                                                                   |
| What is your household make up?                                                                                                                                                                                                                                                                                                                                                                                                                                                                                                                                                                                                                                                 | Single, no dependent children<br>Single, with dependent children<br>Married / de-facto relationship, no dependent children<br>Married / de-facto relationship, with dependent children |
| Thank you for answering the survey questions.<br>If you feel that there are reasons for burnout that is not captured in this survey or if you have any general feedback, please comment in the box below:                                                                                                                                                                                                                                                                                                                                                                                                                                                                       | (Free text response)                                                                                                                                                                   |
| <p>If you are interested in receiving a copy of the final results from this study, please email: <a href="mailto:kun.li@sydney.edu.au">kun.li@sydney.edu.au</a></p> <p>If any of the questions in this survey has evoked feelings of distress, we would recommend seeking assistance from professional organisations or a health professional, including:</p> <ul style="list-style-type: none"> <li>• Beyond Blue Support Services - Ph: 1300 22 4636</li> <li>• Lifeline Australian - Ph: 13 11 14</li> <li>• Your doctor</li> </ul> <p>I understand that by submitting my responses I am consenting for the information I have entered to be used for research purposes.</p> |                                                                                                                                                                                        |

**Supplementary Table 2.** Organisations that agreed to distribute the link to an online survey of burnout and risk factors in Australian emergency and general practice veterinarians.

| <b>Organisation Type</b>                          | <b>Name of Organisation</b>                                                                                                                                                                                            |
|---------------------------------------------------|------------------------------------------------------------------------------------------------------------------------------------------------------------------------------------------------------------------------|
| State or territory veterinary practitioners board | Veterinary Practitioners Board of New South Wales<br>Australian Capital Territory (ACT) Veterinary Practitioners Board<br>Veterinary Practice Board of Western Australia<br>Veterinary Practitioners Board of Victoria |
| Veterinary peak body                              | Australian Veterinary Association                                                                                                                                                                                      |
| College                                           | Australian and New Zealand College of Veterinary Scientists (ANZCVS)<br>ANZCVS – Emergency and Critical Care Chapter                                                                                                   |
| Employers                                         | Greencross Vets<br>VetPartners                                                                                                                                                                                         |
| Continuing education provider                     | Centre for Veterinary Education                                                                                                                                                                                        |
| Social media group                                | Vets Stay Go Diversify – Down Under                                                                                                                                                                                    |

**Supplementary Table 3.** Free-text responses from respondents who selected “other” for the question – “What is the main contributing factor to not finishing on time?” (n=19).

| Common themes                            | Original free-text responses                                                                                                                                                                                                                                                                                                                                                                                                                                                                                                                                                                                      |
|------------------------------------------|-------------------------------------------------------------------------------------------------------------------------------------------------------------------------------------------------------------------------------------------------------------------------------------------------------------------------------------------------------------------------------------------------------------------------------------------------------------------------------------------------------------------------------------------------------------------------------------------------------------------|
| Multifactorial                           | <p>“All of the above”</p> <p>“Combination of walk-ins, tight consult times, computer problems”</p> <p>“Its little bits of everything - some clients late, some clients being squeezed in, some software being slow/not working, never quite enough staff. All the small things add up to frequently not finishing on time”</p> <p>“Many reasons. It is not a profession where we should expect to finish on time every shift - that will only lead to unfulfilled expectation and disappointment”</p> <p>“Animals needing treatments, owners called, etc”</p> <p>“Walk in consults, sometimes short staffed,”</p> |
| Variable depending on the workday        | <p>“Scheduling, walk-ins, internet issues to write up notes, inadequate staffing all contribute but the proportion that they contribute varies with the day”</p> <p>“A combination of those factors; depending on the day.”</p> <p>“Busy and unpredictable caseload”</p> <p>“Nature of emergency work”</p> <p>“Unexpected, involved cases”</p> <p>“Unexpectedly complicated cases”</p>                                                                                                                                                                                                                            |
| Additional non-clinical responsibilities | <p>“Trying to fit in management work on top of consults etc”</p> <p>“Too many responsibilities as veterinary director - doing my work, looking after other people, problem solving and management duties”</p> <p>“The boss, trying to provide support and filling in gaps when short-staffed”</p> <p>“Management tasks”</p> <p>“Management issues taking up clinical time”</p> <p>“Helping other vets”</p> <p>“Owner, always admin and other stuff have to do”</p>                                                                                                                                                |
